# Supplementary material for: Zinc(II) Complexes of Amino Acids as New Active Ingredients for Anti-Acne Dermatological Preparations
Source: MDPI journal article supplement (doi:10.3390/ijms22041641), 2021-02-06
Supplement: s1 [file s1]

Laboratorium badawcze  
zgodnie z normą ISO / IEC 17025

Testing laboratory  
according to the standard ISO / IEC 17025

## Sprawozdanie z badań, nr :

Test report, no :

0055 - MK / A / 09 / 20

rev. 01

(zgodnie z / acc. to LAB-05.00.02, rev.03)

## BADANIE MIKROBIOLOGICZNE / KOSMETYKI / MICROBIOLOGICAL TEST / COSMETICS

Zleceniodawca : Zakład Chemii Surowców Kosmetycznych  
Uniwersytet Medyczny w Łodzi

Customer: ul. Muszyńskiego 1  
91-151 Łódź

Nazwa próbki: **Próbka:** żel ŻDD\_Zn-His\_2.5%\_1\_16.07.20  
Name of sample: **Sample of:**

Numer zlecenia: 0014 - Z / 09 / 20  
Protocol-order No.:

Metoda pobrania próbki (5): Nie podano  
Method of sampling (5): Not given rev.: (N)

Próbka pobrane przez: Klienta  
Sample collected by: Customer

Postępowanie z próbką wg: LAB-05.00.00 rev.: 01  
Handling of sample acc to:

Stan i ilość próbki: Bez zastrzeżeń  
Sample evaluation & quantity: Correct

Data przyjęcia próbki: 02.09.2020  
Date of receiving sample:

Numer próbki: 0058 - P / 09 / 20  
Sample No.:

Data rozpoczęcia badania: 02.09.2020  
Date of analysis start:

Numer analizy : 0055 - MK / A / 09 / 20  
Analysis No.:

Data zakończenie badania: 08.09.2020  
Date of analysis end:

Wyniki badania odnoszą się wyłącznie do badanego obiektu / Results are connected only with samples which were analysed

| L.p.<br>No. | Parametr<br>Parameter                                                                      | Metoda<br>Method        | Kryterium<br>Requirements                   | (5) | Wynik<br>Result [Jednostka/Unit]        | U<br>(6) |
|-------------|--------------------------------------------------------------------------------------------|-------------------------|---------------------------------------------|-----|-----------------------------------------|----------|
| 1.          | Ogólna liczba drobnoustrojów tlenowych<br>Enumeration of aerobic mesophilic microorganisms | PN-EN ISO 21149:2017-07 | 1 x 10 <sup>3</sup> CFU / 1g/1ml (3)        | (A) | < 1 x 10 <sup>1</sup> CFU / 1g/1ml      | N/A      |
| 2.          | Ogólna liczba pleśni i drożdży<br>Enumeration of yeast and mould                           | PN-EN ISO 16212:2017-08 | 1 x 10 <sup>3</sup> CFU / 1g/1ml (3)        | (A) | < 1 x 10 <sup>1</sup> CFU / 1g/1ml      | N/A      |
| 3.          | Obecność zarodników pleśni<br>Detection of mold spores                                     | PN-EN ISO 18415:2017-07 | Nieobecne w 1g/1ml<br>Absence in 1g/1ml (3) | (A) | Nieobecne w 1g/1ml<br>Absence in 1g/1ml | N/A      |
| 4.          | Obecność <i>Pseudomonas aeruginosa</i><br>Detection of <i>Pseudomonas aeruginosa</i>       | PN-EN ISO 22717:2016-01 | Nieobecne w 1g/1ml<br>Absence in 1g/1ml (3) | (A) | Nieobecne w 1g/1ml<br>Absence in 1g/1ml | N/A      |
| 5.          | Obecność <i>Escherichia coli</i><br>Detection of <i>Escherichia coli</i>                   | PN-EN ISO 21150:2016-01 | Nieobecne w 1g/1ml<br>Absence in 1g/1ml (3) | (A) | Nieobecne w 1g/1ml<br>Absence in 1g/1ml | N/A      |
| 6.          | Obecność <i>Staphylococcus aureus</i><br>Detection of <i>Staphylococcus aureus</i>         | PN-EN ISO 22718:2016-01 | Nieobecne w 1g/1ml<br>Absence in 1g/1ml (3) | (A) | Nieobecne w 1g/1ml<br>Absence in 1g/1ml | N/A      |
| 7.          | Obecność <i>Candida albicans</i><br>Detection of <i>Candida albicans</i>                   | PN-EN ISO 18416:2016-01 | Nieobecne w 1g/1ml<br>Absence in 1g/1ml (3) | (A) | Nieobecne w 1g/1ml<br>Absence in 1g/1ml | N/A      |

### Legenda:

- wyniki poniżej zakresu metody (<), dla wyniku poniżej zakresu metody (<) niepewności nie podaje się
- wyniki z niepewnością rozszerzoną - współczynnik rozszerzenia k=2; poziom ufności 95% nie obejmuje niepewności w obszarze pobierania próbki;
- zgodnie z wewnętrznymi wymaganiami Klienta
- badanie podzlecone
- badanie/pobór próbki oznaczone symbolem (A) - badanie/pobór próbek planowane do akredytacji w 2020 roku; symbolem (N) - badanie/pobór próbek nieplanowane do akredytacji w 2020 roku
- U - Niepewność pomiaru
- N/A - nie dotyczy

### Legend:

- result is below the range of method (<), for the result below the range of method (<) uncertainty is not given
- result with expanded uncertainty - the coverage factor k=2, confidence level 95% does not include uncertainties in the sample;
- according to internal Customer requirements
- sub-contracted test
- parameter (A) method / sampling planned for accreditation in 2020; parameter (N) - method / sampling not planned for accreditation in 2020
- U - Uncertainty of measurement
- N/A - not applicable

### Ocena zgodności z wymaganiami / Conformity of assessment with the requirements :

Badana próbka: żel ŻDD\_Zn-His\_2.5%\_1\_16.07.20  
Tested sample:

odpowiada  
comply wymaganiom określonym przez Klienta oraz **PN-EN ISO 17516:2014-01.**  
specified requirements of Customer and **PN-EN ISO 17516:2014-01.**

UWAGI DO WYNIKU: Ocena zgodności. Zasada podejmowania decyzji nr 3 "zasada wskazana przez Klienta". Uwzględnienie kryteriów akceptacji wynikających z normy PN-EN ISO 17516:2014-01, bez uwzględnienia niepewności pomiaru.  
COMMENTS TO THE RESULT: Conformity assessment. Decision rule no. 3 "principle indicated by the client". Taking into account the acceptance criteria resulting from the PN-EN ISO 17516:2014-01 standard, without taking into account the measurement uncertainty.

Brak  
COMMENTS: No comments

**Autoryzował :**

**Authorized :** 08.09.2020 dr Nowaczyk: 003

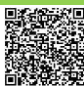

Kierownik Pracowni Mikrobiologii i Fizyko-Chemii (kwalifikowany podpis elektroniczny) \*  
Microbiological & Physico-Chemical Laboratory Manager (qualified electronic signature) \*

(\*) Bezpieczny podpis elektroniczny weryfikowany przy pomocy certyfikatu kwalifikowanego jest równoważny pod względem skutków prawnych z podpisem własnoręcznym. Oryginalne sprawozdanie z badań są wydawane w formie elektronicznej z rozszerzeniem ".sig.pdf" lub "\_.signed.pdf". W związku z tym wszystkie wydruki, o ile nie są potwierdzone za zgodność z oryginałem, są kopiami.

(\*) Secure electronic signature verified by a qualified certificate is equivalent in terms of legal consequences handwritten signature. The original test report is issued in electronic form with the extension ".sig.pdf" lub "\_.signed.pdf". Therefore, all prints, if not confirmed as being true to the original, are copies.

Badania wykonywane w dr Nowaczyk Centrum Badań i Innowacji Sp. z o.o. Sp.K. są prowadzone zgodnie ze standardowymi metodami badawczymi. Użytkowane wyniki są zgodne z przyjętymi międzynarodowymi standardami, chyba że zostały ustalone inne szczególne wymagania, zastrzeżone na piśmie przez dr Nowaczyk Centrum Badań i Innowacji Sp. z o.o. Sp.K. oraz Klienta, przed rozpoczęciem badania. Wyniki badań odnoszą się wyłącznie do przebadanych próbek, w określonych warunkach i przy użyciu metod badawczych i procedur uzgodnionych wcześniej z Klientem. Obowiązkiem Klienta jest zapewnienie, że każda jednostka produktu i opakowania jest wyprodukowana w sposób identyczny. dr Nowaczyk Centrum Badań i Innowacji Sp. z o.o. Sp.K. nie ponosi odpowiedzialności za jakiegokolwiek wniosek, interpretację i uogólnienia wykonane przez Klienta z wydanych przez dr Nowaczyk Centrum Badań i Innowacji Sp. z o.o. Sp.K. sprawozdań z badań. Niniejsze Sprawozdanie z Badania jest pełną własnością Klienta. Bez pisemnej zgody dr Nowaczyk Centrum Badań i Innowacji Sp. z o.o. Sp.K. sprawozdanie z badania nie może być powielane inaczej jak tylko w całości.

Testing at dr Nowaczyk Centrum Badań i Innowacji Sp. z o.o. Sp.K. is performed according to standard test procedures. Reported test results are accurate to generally accepted international standards, unless specific requirements have been agreed to in writing by dr Nowaczyk Centrum Badań i Innowacji Sp. z o.o. Sp.K. and Customer prior to the test commencing. Our reports apply only to the specific samples tested, under stated conditions and using test methods and routines agreed in advance with our customers. It is the manufacturer's responsibility to assure that additional production units of product and package are manufactured identically. dr Nowaczyk Centrum Badań i Innowacji Sp. z o.o. Sp.K. shall have no liability for any deductions, inferences or generalisations drawn by the Customers or others from dr Nowaczyk Centrum Badań i Innowacji Sp. z o.o. Sp.K. issued reports. This report is the confidential property of dr Nowaczyk Centrum Badań i Innowacji Sp. z o.o. Sp.K. and its Customer. Extracts from the test report shall not be reproduced, except in full, and not without prior written approval of dr Nowaczyk Centrum Badań i Innowacji Sp. z o.o. Sp.K.

Sprawozdanie z badania zostało sporządzone w jednym egzemplarzu.  
Test Report prepared in single copy.

Oryginał nr 1 : Klient  
Original copy No. 1 : Customer

Kopia egzemplarza nr 1 : Archiwum  
Duplicate of copy No. 1 : Archive
