# Supplementary material for: Zinc(II) Complexes of Amino Acids as New Active Ingredients for Anti-Acne Dermatological Preparations
Source: MDPI journal article supplement (doi:10.3390/ijms22041641), 2021-02-06
Supplement: s1 [file s1]

## Sprawozdanie z badań, nr :

Test report, no :

0003 - MB / A / 09 / 20

rev. 03

(zgodnie z / acc. to LAB-05.00.03, rev.03)

TEST KONSERWACJI / KOSMETYKI / CHALLENGE TEST / COSMETICS

Zleceniodawca : Zakład Chemii Surowców Kosmetycznych

Customer: Uniwersytet Medyczny w Łodzi

ul. Muszyńskiego 1

91-151 Łódź

Nazwa próbki: Żel ŻDD\_Zn-His\_2.5%\_1\_16.07.20  
Name of sample: Sample of :

Metoda badawcza : Ph. Eur. 10.0 , <5.1.3>  
Test Method :

Numer zlecenia: 0014 - Z / 09 / 20  
Protocol-order No.:

Metoda pobrania próbki (5): Nie podano  
Method of sampling (5): Not given rev.: (N)

Próbka pobrana przez: Klienta  
Sample collected by: Customer

Postępowanie z próbką wg: LAB-05.00.00  
Handling of sample acc to: rev.: 01

Stan i ilość próbki: Bez zastrzeżeń  
Sample evaluation & quantity: Correct

Data przyjęcia próbki: 02.09.2020  
Date of receiving sample:

Numer próbki: 0058 - P / 09 / 20  
Sample No.:

Data rozpoczęcia badania: 02.09.2020  
Date of analysis start:

Numer analizy: 0003 - MB / A / 09 / 20  
Analysis No.:

Data zakończenie badania: 12.10.2020  
Date of analysis end:

Układ konserwujący : Euxyl PE 9010 1%  
Preservation System : Zinc Histidine Complex 1.27%

### Wyniki badania odnoszą się wyłącznie do badanego obiektu / Results are connected only with samples which were analysed

Neutralizator : Bulion Eugon LT 100, skład: pankreatynowy hydrolizat kazeiny 15g, papainowy hydrolizat maczki sojowej 5g, chlorek sodu 4g, L-cystyna 0.7g, siarczan (IV) sodu 0.2g

Neutralizer : Broth Eugon LT 100: composition: pancreatin casein hydrolyzate 15g, papain soybean poppy hydrolyzate 5g, sodium chloride 4g, L-cystine 0.7g, sodium sulfate (IV) 0.2g

Pożywki mikrobiologiczne : Bacteria - Tryptic soy agar (TSA) ; drożdże i pleśń/yeast & molds - Sabouraud Dextrose Agar medium (SDA) ;  
Media :

Warunki inkubacji : 32,5 ± 2,5° C; 3 - 5 days (bacteria)

Incubation conditions : 22,5 ± 2,5° C; 3 - 5 days (yeast & molds)

Wielkość próbki : 20g [19,5 - 20,4 g] próbki dla każdego szczepu wzorcowego, 22,5 ± 2,5°C, 28 dni

Sample size : 20g [19.5-20.4 g] samples for each reference strain, 22.5 ± 2.5°C, 28 days

Kalibrowana zawiesina : 0,2 ml kalibrowanej zawiesiny, stężenie końcowe w próbce: 1,0 x 10<sup>5</sup> - 1,0 x 10<sup>6</sup> CFU/g

Calibrated suspension: 0,2 ml of calibrated suspension, final concentration in the sample: 1.0 x 10<sup>5</sup> - 1.0 x 10<sup>6</sup> CFU/g

| L.p. No. | Parametr Parameter                                                                                                                                                                                                                                                                                                                           | szczep strain                              | Nvf [CFU/g]           | Nvn [CFU/g]           | Nvf ≥ 0,5 Nvn | Kontrola Nv Control Nv | N [CFU/ml]            | No [CFU/ml]           | (3) |
|----------|----------------------------------------------------------------------------------------------------------------------------------------------------------------------------------------------------------------------------------------------------------------------------------------------------------------------------------------------|--------------------------------------------|-----------------------|-----------------------|---------------|------------------------|-----------------------|-----------------------|-----|
| 1.       | Wykazanie skuteczności neutralizatora<br>Demonstration of neutralizer effectiveness<br>Nvf - liczba jtk w mieszaninie neutralizatora i badanej próbki<br>No. of CFU in the mixture with neutralizer and tested sample<br>Nvn - liczba jtk mieszaninie bez badanej próbki<br>No. of CFU in the mixture without tested sample<br>Nvf ≥ 0,5 Nvn | <i>Escherichia coli</i> ATCC 8739          | 5,5 x 10 <sup>1</sup> | 5,6 x 10 <sup>1</sup> | ≥ 0,5         | 5,2 x 10 <sup>1</sup>  | 5,3 x 10 <sup>6</sup> | 5,3 x 10 <sup>5</sup> | (N) |
|          |                                                                                                                                                                                                                                                                                                                                              | <i>Staphylococcus aureus</i> ATCC 6538     | 4,3 x 10 <sup>1</sup> | 4,5 x 10 <sup>1</sup> | ≥ 0,5         | 3,9 x 10 <sup>1</sup>  | 4,1 x 10 <sup>6</sup> | 4,1 x 10 <sup>5</sup> |     |
|          |                                                                                                                                                                                                                                                                                                                                              | <i>Pseudomonas aeruginosa</i> ATCC 9027    | 3,9 x 10 <sup>1</sup> | 4,0 x 10 <sup>1</sup> | ≥ 0,5         | 3,7 x 10 <sup>1</sup>  | 3,7 x 10 <sup>6</sup> | 3,7 x 10 <sup>5</sup> |     |
|          | Inokulum / Inoculum<br>N - początkowa liczba drobnoustrojów<br>initial number of microorganisms<br>No - liczba drobnoustrojów po czasie To<br>number of microorganisms after time To<br>No=N/100                                                                                                                                             | <i>Candida albicans</i> ATCC 10231         | 3,5 x 10 <sup>1</sup> | 3,7 x 10 <sup>1</sup> | ≥ 0,5         | 3,0 x 10 <sup>1</sup>  | 3,2 x 10 <sup>6</sup> | 3,2 x 10 <sup>5</sup> |     |
|          |                                                                                                                                                                                                                                                                                                                                              | <i>Aspergillus brasiliensis</i> ATCC 16404 | 4,2 x 10 <sup>1</sup> | 4,5 x 10 <sup>1</sup> | ≥ 0,5         | 4,0 x 10 <sup>1</sup>  | 4,1 x 10 <sup>6</sup> | 4,1 x 10 <sup>5</sup> |     |

### WYNIKI / RESULTS

| L.p. No. | Parametr Parameter                                                                                                                                                                                                                                                                                                                                                                                                                                                                       | szczep strain                              | Logarytm redukcji w czasie Tx [Rx] / Logarithm of reduction in time Tx [Rx] |                     |      |                     |         |                     | (3) |
|----------|------------------------------------------------------------------------------------------------------------------------------------------------------------------------------------------------------------------------------------------------------------------------------------------------------------------------------------------------------------------------------------------------------------------------------------------------------------------------------------------|--------------------------------------------|-----------------------------------------------------------------------------|---------------------|------|---------------------|---------|---------------------|-----|
|          |                                                                                                                                                                                                                                                                                                                                                                                                                                                                                          |                                            | T2                                                                          | kryterium criterion | T7   | kryterium criterion | T14     | kryterium criterion |     |
| 2.       | Test konserwacji<br>Challenge test<br>Rx = lg No - lg Nx<br>No - liczba drobnoustrojów w czasie To<br>No. of CFU at time To<br>Nx - liczba drobnoustrojów w czasie Tx<br>No. of CFU at time Tx<br>NI - liczba drobnoustrojów nie zwiększa się w czasie T7, T14, T28 dni<br>No. of CFU does not increase at time T7, T14, T28 days<br>Rx = 0 gdy / when lg No = lg Nx<br>(brak wzrostu populacji względem wyjściowego zliczania) / (no population increase relative to the initial count) | <i>Escherichia coli</i> ATCC 8739          | 4,25                                                                        | ≥ 2                 | 4,25 | ≥ 3                 | 4,25 NI | ≥ 2 i NI            | (N) |
|          |                                                                                                                                                                                                                                                                                                                                                                                                                                                                                          | <i>Staphylococcus aureus</i> ATCC 6538     | 4,14                                                                        | ≥ 2                 | 4,14 | ≥ 3                 | 4,14 NI | ≥ 2 i NI            |     |
|          |                                                                                                                                                                                                                                                                                                                                                                                                                                                                                          | <i>Pseudomonas aeruginosa</i> ATCC 9027    | 4,09                                                                        | ≥ 3                 | 4,09 | ≥ 3                 | 4,09 NI | ≥ 2 i NI            |     |
|          |                                                                                                                                                                                                                                                                                                                                                                                                                                                                                          | <i>Candida albicans</i> ATCC 10231         |                                                                             |                     |      |                     | 4,03    | ≥ 2                 |     |
|          |                                                                                                                                                                                                                                                                                                                                                                                                                                                                                          | <i>Aspergillus brasiliensis</i> ATCC 16404 |                                                                             |                     |      |                     | 4,44    | ≥ 2                 |     |

Zgodnie z Ph. Eur. 10. tab. 5.1.3-2 preparaty do uszu, preparaty do nosa, preparaty do stosowania na skórę i preparaty do inhalacji

According to the EP 10.0, tab. 5.1.3-2 for ear preparations, nasal preparations, preparations for cutaneous application and preparations for inhalation

| Wymagania / Requirements             |  |                     |      |      |          |             |     |                 |          |
|--------------------------------------|--|---------------------|------|------|----------|-------------|-----|-----------------|----------|
| mikroorganizmy / microorganisms      |  | Bakterie / Bacteria |      |      |          | C. albicans |     | A. brasiliensis |          |
| czas pobrania próbki / sampling time |  | T2                  | T7   | T14  | T28      | T7          | T14 | T28             | T28      |
| Kryterium A / Criterion A            |  | ≥ 2                 | ≥ 3  | brak | ≥ 3 i NI | brak        | ≥ 2 | ≥ 2 i NI        | ≥ 2 i NI |
| Kryterium B / Criterion B            |  | brak                | brak | ≥ 3  | ≥ 3 i NI | brak        | ≥ 1 | ≥ 1 i NI        | ≥ 1 i NI |

Legenda:

(1) - zgodnie z wewnętrznymi wymaganiami Klienta

(2) - badanie podzlecane

(3) - badanie/pobór próbki oznaczone symbolem (A) - badanie/pobór próbki planowane do akredytacji w 2020 roku; symbolem (N) - badanie/pobór próbki nieplanowane do akredytacji w 2020 roku  
N/A - nie dotyczy

Legend:

(1) - according to internal Customer requirements

(2) - sub-contracted test

(3) - parameter (A) method / sampling planned for accreditation in 2020 ; parameter (N) - method / sampling not planned for accreditation in 2020

N/A - not applicable

**Autoryzował :**

**Authorized :**

27.10.2020

data / date

drNowaczyk: 003

Nr pracownika / Employee no

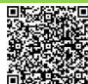

kod QR /QR code

Kierownik Pracowni Mikrobiologii i Fizyko-Chemii (kwalifikowany podpis elektroniczny)\*

Microbiological & Physico-Chemical Laboratory Manager (qualified electronic signature)\*

funkcja / position

UWAGA : Bezpieczny podpis elektroniczny weryfikowany przy pomocy certyfikatu kwalifikowanego jest równoważny pod względem skutków prawnych z podpisem własnoręcznym. Oryginalne sprawozdanie z badań są wydawane w formie elektronicznej z rozszerzeniem ".sig.pdf" lub ".signed.pdf". W związku z tym wszystkie wydruki, o ile nie są potwierdzone za zgodność z oryginałem, są kopiami.

COMMENTS : Secure electronic signature verified by a qualified certificate is equivalent in terms of legal consequences handwritten signature. The original test report is issued in electronic form with the extension ".sig.pdf" lub ".signed.pdf". Therefore, all prints, if not confirmed as being true to the original, are copies.

Badania wykonywane w dr Nowaczyk Centrum Badań i Innowacji Sp. z o.o.Sp.K. są prowadzone zgodnie ze standardowymi metodami badawczymi. Uzyskane wyniki są zgodne z przyjętymi międzynarodowymi standardami, chyba że zostały ustalone inne szczegółowe wymagania, zatwierdzone na piśmie przez dr Nowaczyk Centrum Badań i Innowacji Sp. z o.o.Sp.K. oraz Klienta, przed rozpoczęciem badania. Wyniki badań odnoszą się wyłącznie do przebadanych próbek, w określonych warunkach i przy użyciu metod badawczych i procedur uzgodnionych wcześniej z Klientem. Obowiązkiem Klienta jest zapewnienie, że każda jednostka produktu i opakowania jest wyprodukowana w sposób identyczny. dr Nowaczyk Centrum Badań i Innowacji Sp. z o.o.Sp.K. nie ponosi odpowiedzialności za jakiegokolwiek wniosek, interpretację i uogólnienia wykonane przez Klienta z wydanych przez dr Nowaczyk Centrum Badań i Innowacji Sp. z o.o.Sp.K. sprawozdań z badań. Niniejsze Sprawozdanie z Badania jest poufną własnością Klienta. Bez pisemnej zgody dr Nowaczyk Centrum Badań i Innowacji Sp. z o.o.Sp.K. sprawozdanie z badania nie może być powielane inaczej jak tylko w całości.

Testing at dr Nowaczyk Centrum Badań i Innowacji Sp. z o.o.Sp.K. is performed according to standard test procedures. Reported test results are accurate to generally accepted international standards, unless specific requirements have been agreed to in writing by dr Nowaczyk Centrum Badań i Innowacji Sp. z o.o.Sp.K. and Customer prior to the test commencing. Our reports apply only to the specific samples tested, under stated conditions and using test methods and routines agreed in advance with our customers. It is the manufacturer's responsibility to assure that additional production units of product and package are manufactured identically. dr Nowaczyk Centrum Badań i Innowacji Sp. z o.o.Sp.K. shall have no liability for any deductions, inferences of generalisations drawn by the Customers or others from dr Nowaczyk Centrum Badań i Innowacji's issued reports. This report is the confidential property of dr Nowaczyk Centrum Badań i Innowacji Sp. z o.o.Sp.K. and its Customer. Extracts from the test report shall not be reproduced, except in full, and not without prior written approval of dr Nowaczyk Centrum Badań i Innowacji Sp. z o.o.Sp.K.

Sprawozdanie z badania zostało sporządzone w jednym egzemplarzu.

Test Report prepared in single copy.

Oryginał nr 1 : Klient

Original copy No. 1 : Customer

Kopia egzemplarza nr 1 :

Duplicate of copy No. 1 :

Archiwum

Archive
